# Supplementary material for: Tracking photoinduced charge separation in a perfluorinated Zn-tetraphenylporphyrin sensitizer
Source: Royal Society of Chemistry journal article supplement (doi:10.1039/d4nj02484b), 2024-01-01
Supplement: d4nj02484b1.pdf [file d4nj02484b1.pdf]

## Supporting Information

### Tracking Photoinduced Charge Separation in a Perfluorinated Zn-Tetraphenylporphyrin Sensitizer

Daniel H. Cruz Neto, Philipp Gotico, Thu-Trang Tran, Caroline Szantai, Zakaria Halime, Marie Sircoglou, Juan Soto, Karine Steenkeste, Daniel Peláez,\* Thomas Pino,\* , Minh-Huong Ha-Thi\*

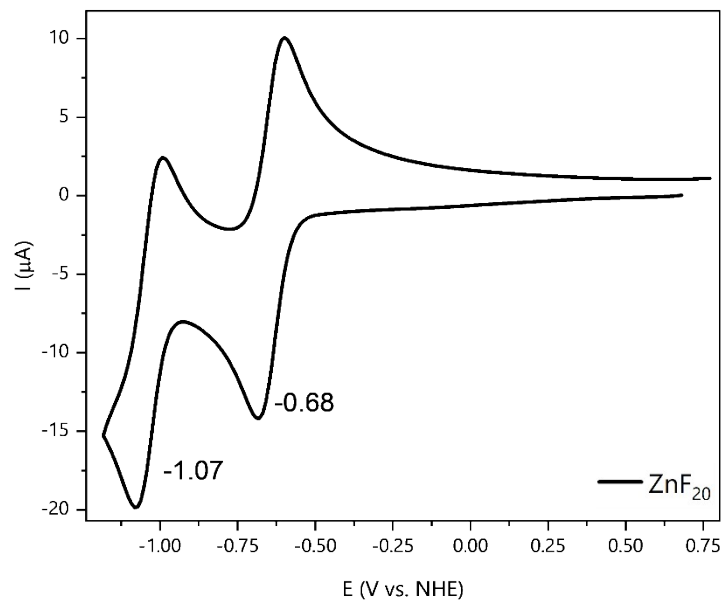

**Figure S1.** Cyclic voltammogram of 1 mM  $\text{ZnF}_{20}$  in Ar-saturated  $\text{CH}_3\text{CN}$  (black) and  $\text{CH}_3\text{CN}/\text{H}_2\text{O}$  (9:1, red), containing 100 mM tertbutylammonium hexafluorophosphate. WE: glassy carbon electrode, CE: Pt wire, RE:  $\text{Ag}/\text{AgNO}_3$  (ferrocene was added as internal refe

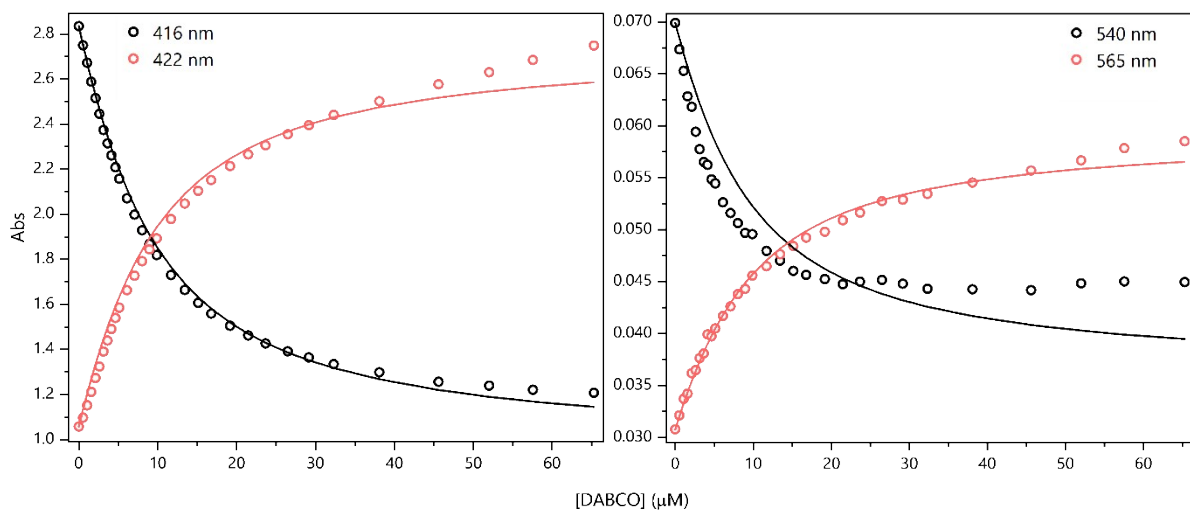

**Figure S2.** Absorption changes observed on the titration of  $4.9 \mu\text{M}$   $\text{ZnF}_{20}$  with DABCO in the Soret region (left) and for the Q-bands (right). Solid lines represent the fit obtained by simulating the system with an ML model, where  $\text{M} = \text{ZnF}_{20}$  and  $\text{L} = \text{DABCO}$ . The corresponding absorption spectra are shown in Figure 2 of the main text. The equilibrium constant  $\beta_{11}$  for the formation of the ML complex is defined as:  $\text{M} + \text{L} \rightleftharpoons \text{ML}$  ( $\beta_{11}$ ).

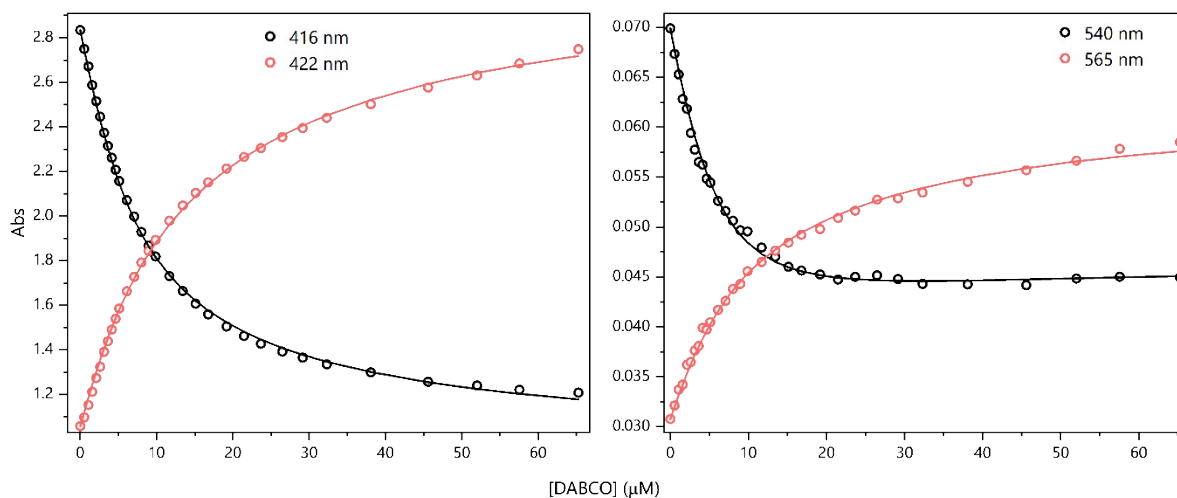

**Figure S3.** Absorption changes observed on the titration of  $4.9 \mu\text{M}$   $\text{ZnF}_{20}$  with DABCO in the Soret region (left) and for the Q-bands (right). Solid lines represent the fit obtained by simulating the system with an  $\text{ML}_2$  model, where  $\text{M} = \text{ZnF}_{20}$  and  $\text{L} = \text{DABCO}$ . The corresponding absorption spectra are shown in Figure 2 of the main text. The global equilibrium constants  $\beta_{11}$  and  $\beta_{12}$  for the formation of the  $\text{ML}$  and  $\text{ML}_2$  complexes are defined as:  $\text{M} + \text{L} \rightleftharpoons \text{ML}$  ( $\beta_{11}$ ), and  $\text{M} + 2\text{L} \rightleftharpoons \text{ML}_2$  ( $\beta_{12}$ ).

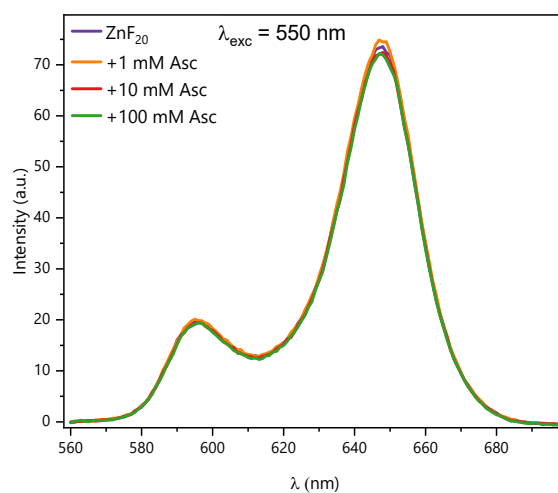

**Figure S4.** Emission spectra of  $\text{ZnF}_{20}$  ( $4.9 \mu\text{M}$ ) upon addition of different concentrations of ascorbate in  $\text{CH}_3\text{CN}/\text{H}_2\text{O}$  (6:4).  $\lambda_{\text{exc}} = 550 \text{ nm}$ .

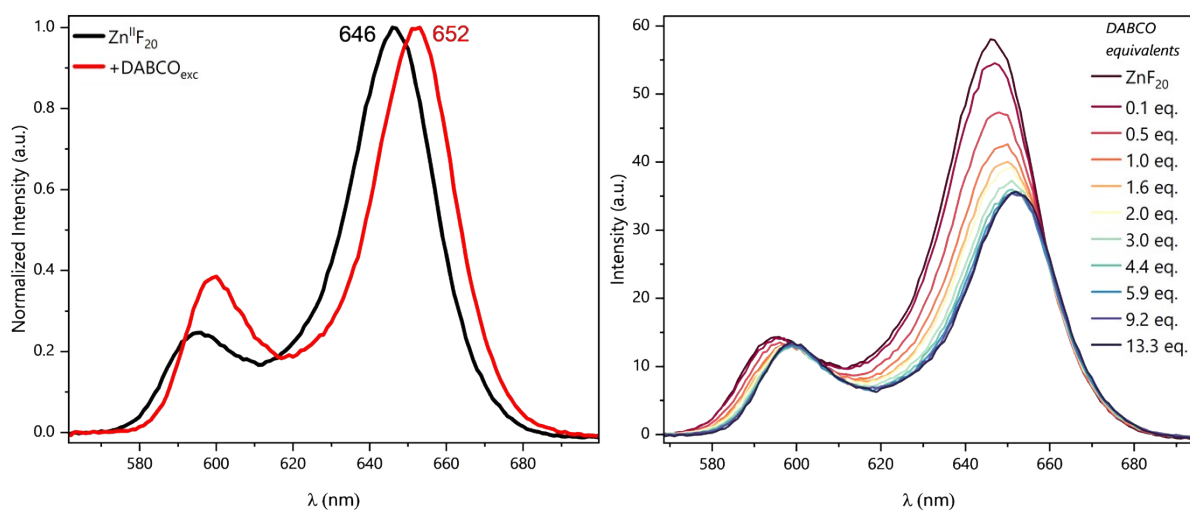

**Figure S5.** Left panel: normalized emission spectra of  $5.4 \mu\text{M}$   $\text{ZnF}_{20}$  alone and in the presence of 100 mM DABCO in  $\text{CH}_3\text{CN}$ . Right panel: steady state emission spectra of  $5.4 \mu\text{M}$   $\text{ZnF}_{20}$  upon titration with DABCO, showing emission quenching in the presence of the coordinating donor.  $\lambda_{\text{exc}} = 550 \text{ nm}$ .

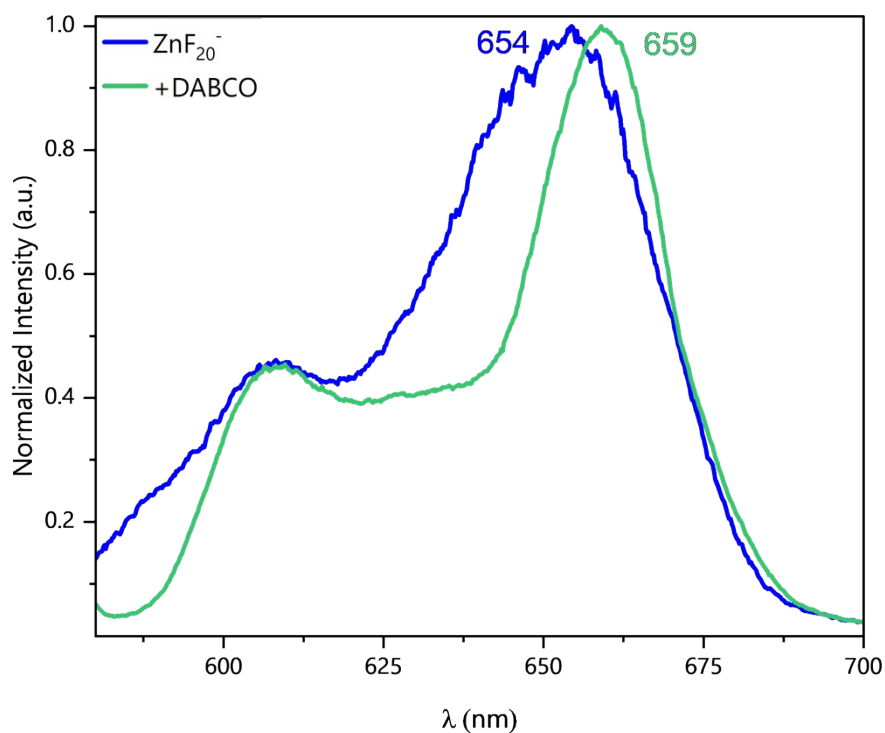

**Figure S6.** Normalized emission spectra of chemically-reduced  $\text{ZnF}_{20}$  alone (blue,  $\lambda_{\text{exc}} = 555 \text{ nm}$ ) and in the presence of 100 mM DABCO (green,  $\lambda_{\text{exc}} = 565 \text{ nm}$ ) in  $\text{CH}_3\text{CN}$ . Chemical reduction was achieved upon addition of 1 eq.  $\text{CoCp}_2$  as a reducing agent.

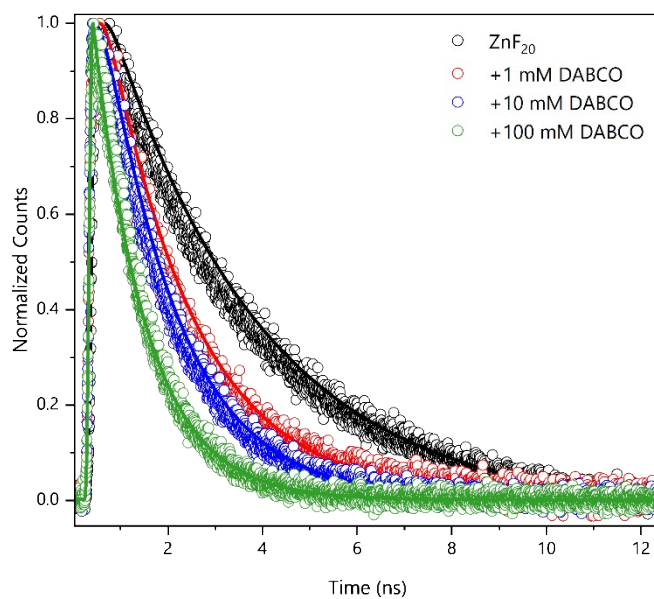

**Figure S7.** Fluorescence decay of ZnF<sub>20</sub> in the presence of different concentrations of DABCO in CH<sub>3</sub>CN. Two photon excitations at 800 nm.

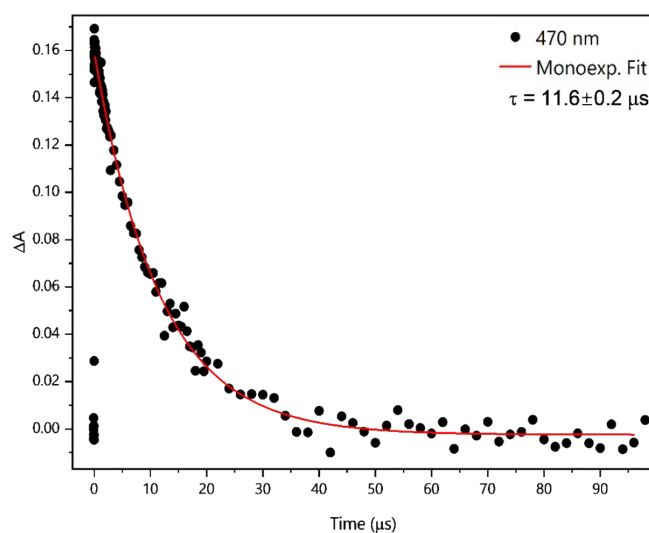

**Figure S8.** Kinetic decay recorded at 470 nm of 5.8 μM ZnF<sub>20</sub> in CH<sub>3</sub>CN with the corresponding monoexponential fit generating a time constant of  $\tau = 11.6 \pm 0.2 \mu\text{s}$ . OTA spectra are shown in Figure 3a of the main text.  $\lambda_{\text{exc}} = 423 \text{ nm}$ , 1 mJ/pulse.

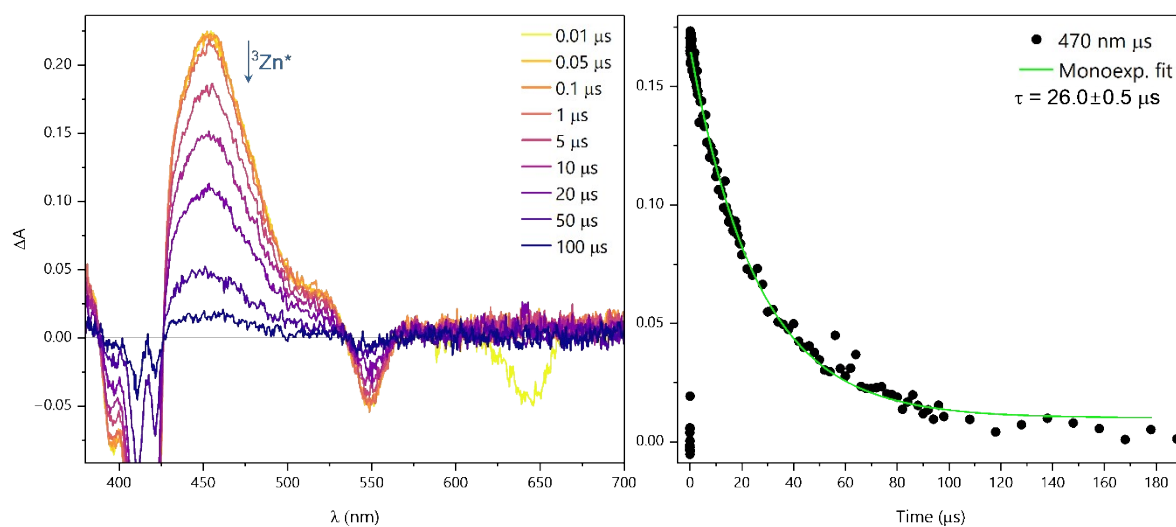

**Figure S9.** Transient absorption spectra (left panel) of  $5.8 \mu\text{M ZnF}_{20}$  in  $\text{CH}_3\text{CN}/\text{H}_2\text{O}$  (6:4) and the corresponding monoexponential fit generating a time constant of  $\tau = 26 \pm 0.5 \mu\text{s}$  (right panel).  $\lambda_{\text{exc}} = 423 \text{ nm}$ ,  $1 \text{ mJ/pulse}$ .

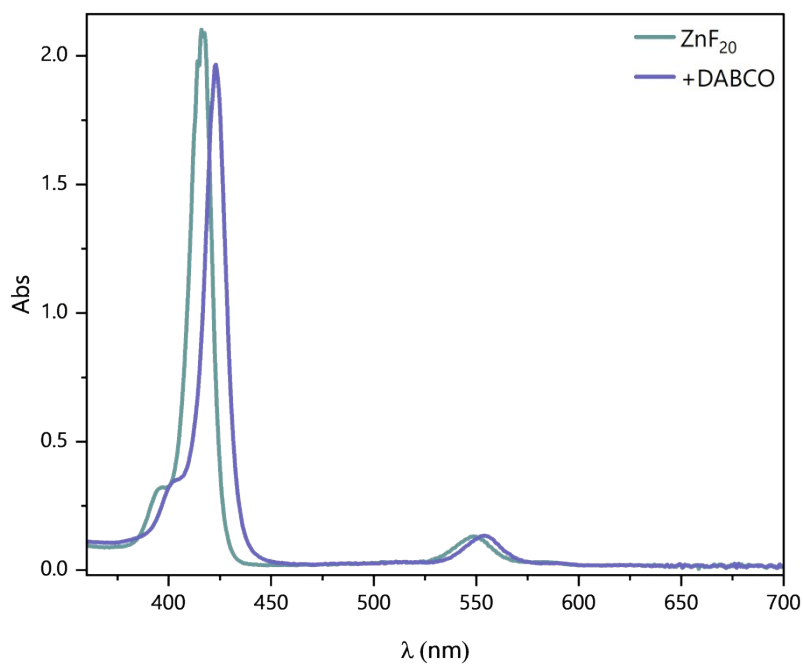

**Figure S10.** Absorption spectrum of the sample containing  $5.8 \mu\text{M ZnF}_{20}$  (green) and upon addition of  $100 \text{ mM DABCO}$  (purple).

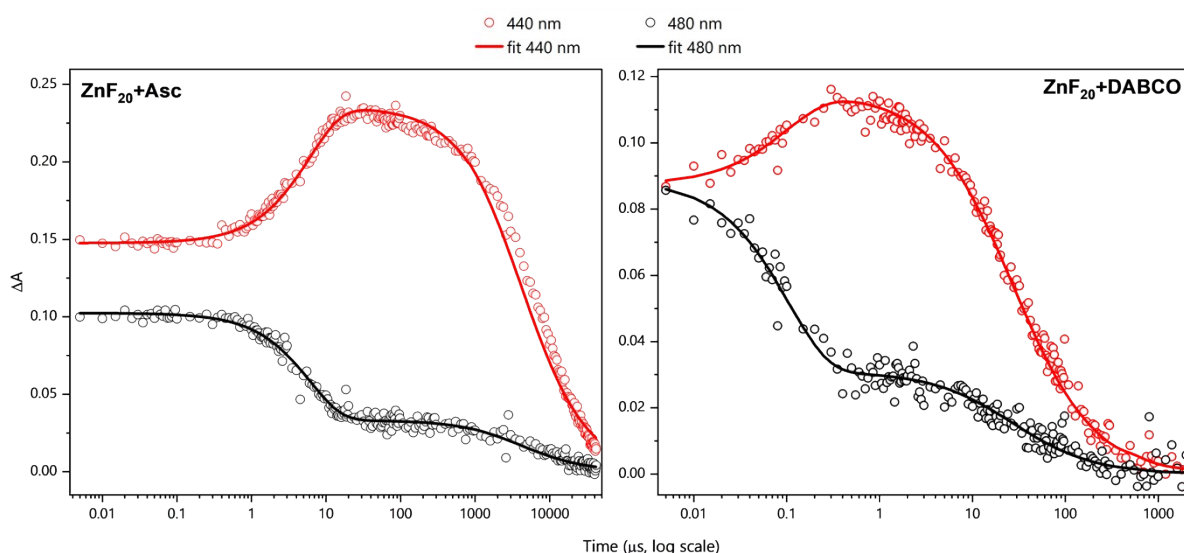

**Figure S11.** Fitting at selected wavelengths from the spectro-kinetic simulations obtained with the bimolecular reactions presented in Table S1 for (left) ascorbate. For DABCO, biexponential functions were used to fit the dataset (right). The corresponding transient spectra are presented in Figure 3.

**Table S1.** Bimolecular reaction model used for the simulation of spectro-kinetic data and the corresponding rate constants. ED = electron donor.

| #                | Reaction                                                                     | ED = DABCO                                                 | ED = Asc                                                |
|------------------|------------------------------------------------------------------------------|------------------------------------------------------------|---------------------------------------------------------|
| $k_q$            | ${}^3\text{Zn}^* + \text{ED} \rightarrow \text{Zn}^{\text{I}} + \text{ED}^+$ | $1.3 (\pm 0.1) \times 10^7 \text{ s}^{-1}$                 | $1.5 (\pm 0.5) \times 10^6 \text{ M}^{-1}\text{s}^{-1}$ |
| $k_{\text{rec}}$ | $\text{Zn}^{\text{I}} + \text{ED}^+ \rightarrow \text{Zn} + \text{ED}$       | $2.6 (\pm 0.8) \times 10^{10} \text{ M}^{-1}\text{s}^{-1}$ | $1.3 (\pm 0.4) \times 10^8 \text{ M}^{-1}\text{s}^{-1}$ |

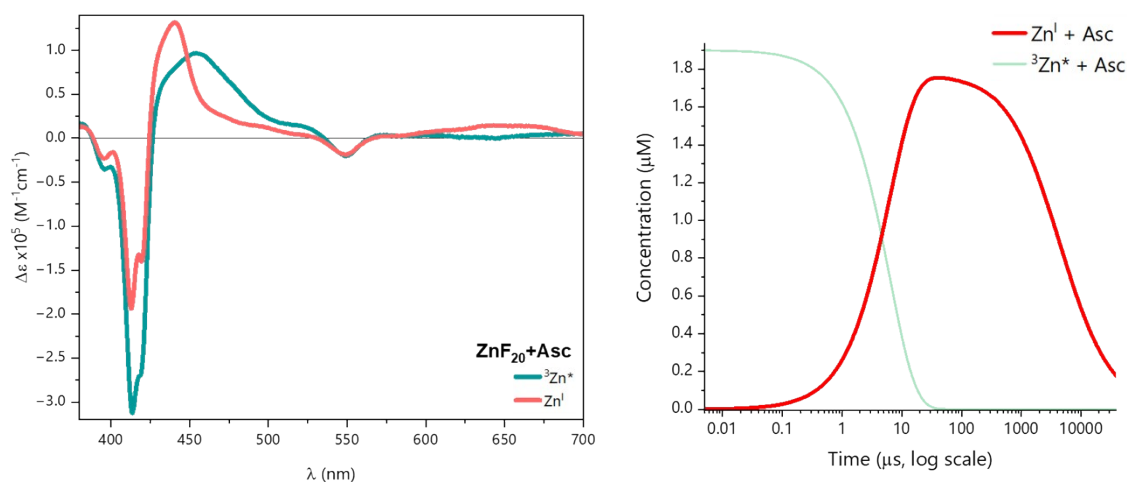

**Figure S12.** Species-associated difference spectra (SADS) obtained from the spectro-kinetic simulations performed with the bimolecular reactions presented in Table S1 the ascorbate-containing system (left). The corresponding evolution of the transient species is shown on the right panel.

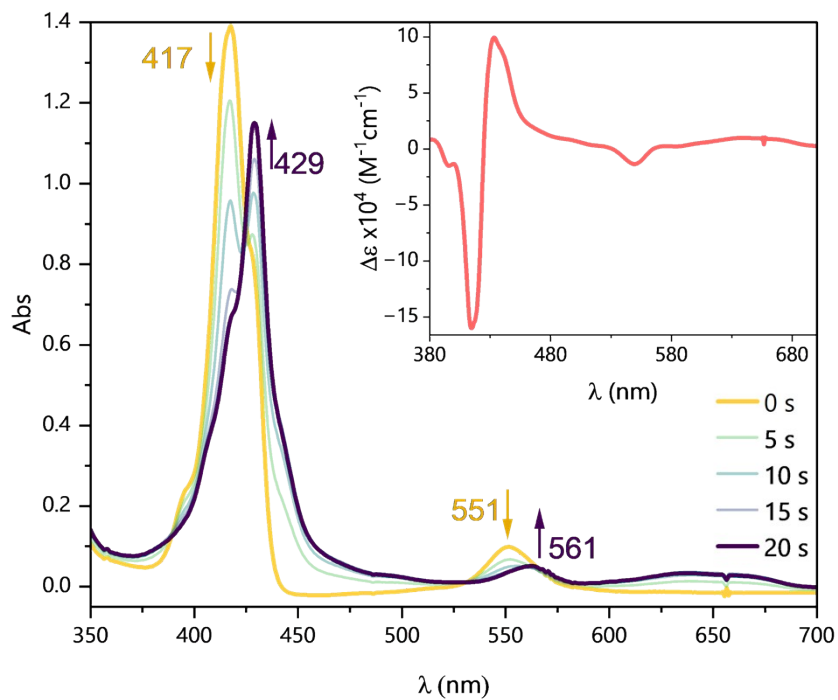

**Figure S13.** Photoaccumulation measurements on  $4.8 \mu\text{M ZnF}_{20}$  using  $1 \text{ mM BIH}$  as a sacrificial electron donor in  $\text{CH}_3\text{CN}$ . Inset: differential spectrum.  $\lambda_{\text{exc}} = 405 \text{ nm}$ ,  $58 \text{ mW}$ .

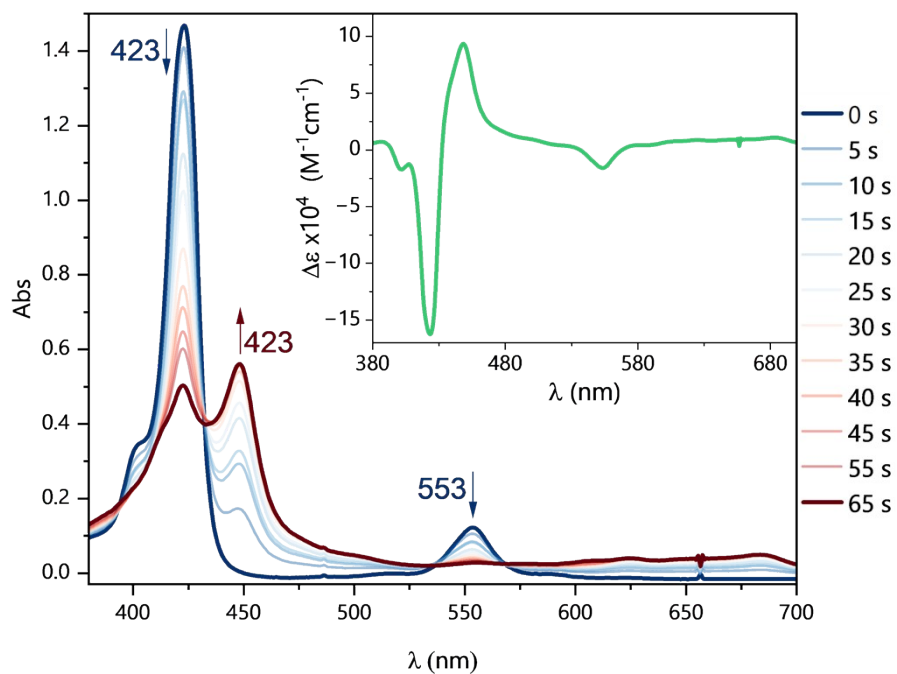

**Figure S14.** Photoaccumulation measurements on  $4.8 \mu\text{M ZnF}_{20}$  in the presence of  $5 \text{ mM DABCO}$  and using  $1 \text{ mM BIH}$  as a sacrificial electron donor in  $\text{CH}_3\text{CN}$ . Inset: differential spectrum.  $\lambda_{\text{exc}} = 405 \text{ nm}$ ,  $58 \text{ mW}$ .



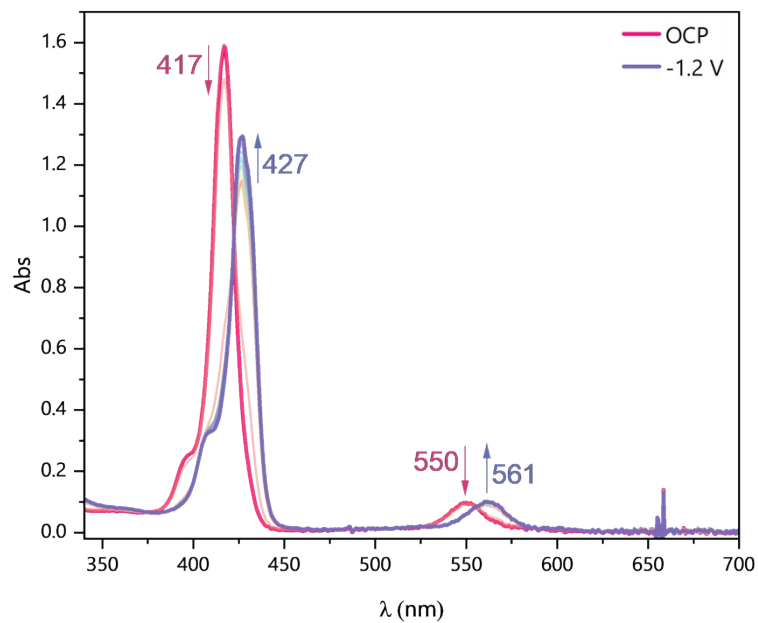

**Figure S15.** UV-Vis spectroelectrochemical experiments with  $\sim 45 \mu\text{M}$   $\text{ZnF}_{20}$  in the presence of 100 mM  $\text{TBAPF}_6$  in deaerated  $\text{CH}_3\text{CN}$  before (pink) and after (violet) applying  $-1.2 \text{ V}$  vs.  $\text{Ag}/\text{Ag}^+$  on a Pt-mesh working electrode.

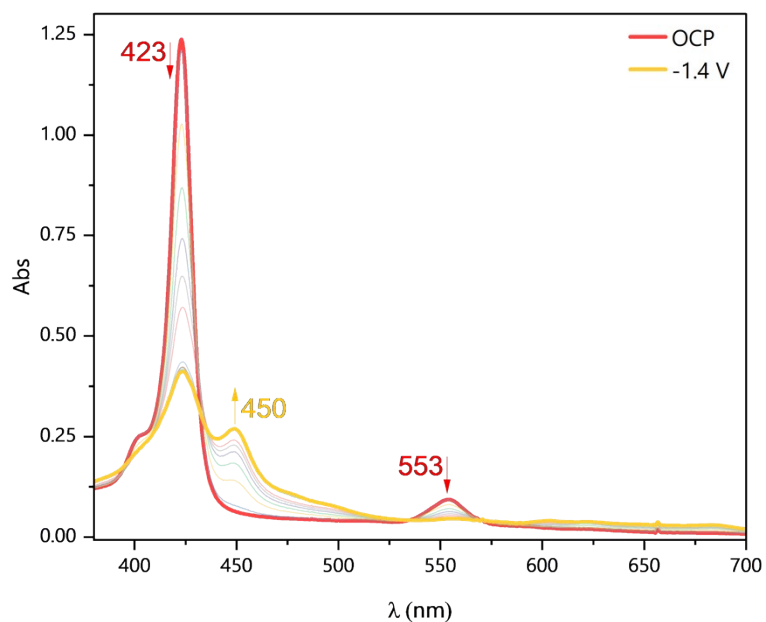

**Figure S16.** UV-Vis spectroelectrochemical experiments with  $\sim 45 \mu\text{M}$   $\text{ZnF}_{20}$  in the presence of 100 mM DABCO and 100 mM  $\text{TBAPF}_6$  in deaerated  $\text{CH}_3\text{CN}$  before (red) and after (yellow) applying  $-1.4 \text{ V}$  vs.  $\text{Ag}/\text{Ag}^+$  on a Pt-mesh working electrode.

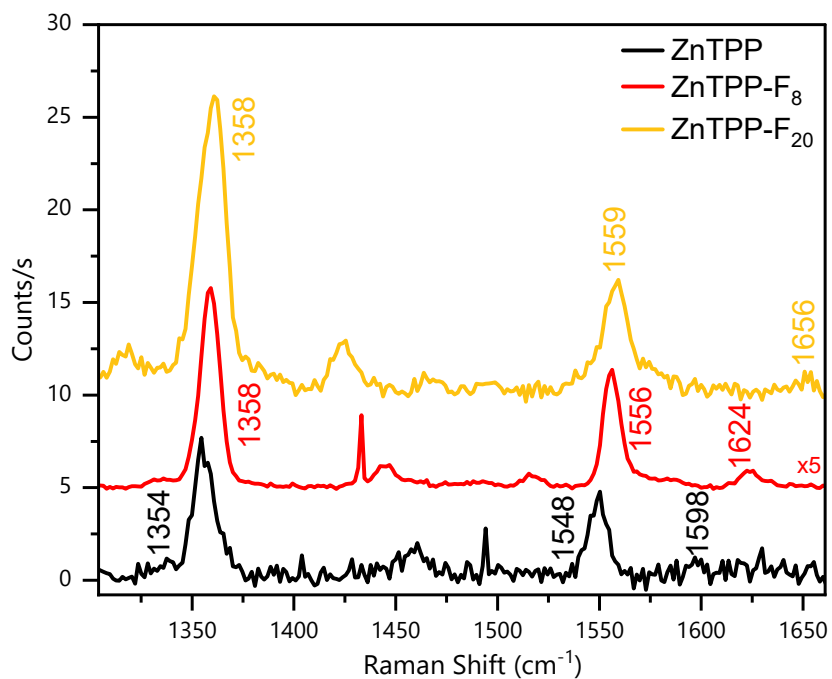

**Figure S17.** Resonance Raman spectra of ZnTPP, ZnTPP-F<sub>8</sub>, and ZnTPP-F<sub>20</sub> showing the effect of the fluorine atoms on the observed normal modes of the porphyrin. The effect of fluorine substitution on the phenyl rings is clearly shown on the bands with a strong phenyl character – 1656 cm<sup>-1</sup>, for instance. Spectra were recorded in solid state with  $\lambda_{\text{exc}} = 405 \text{ nm}$ , 30 mW.

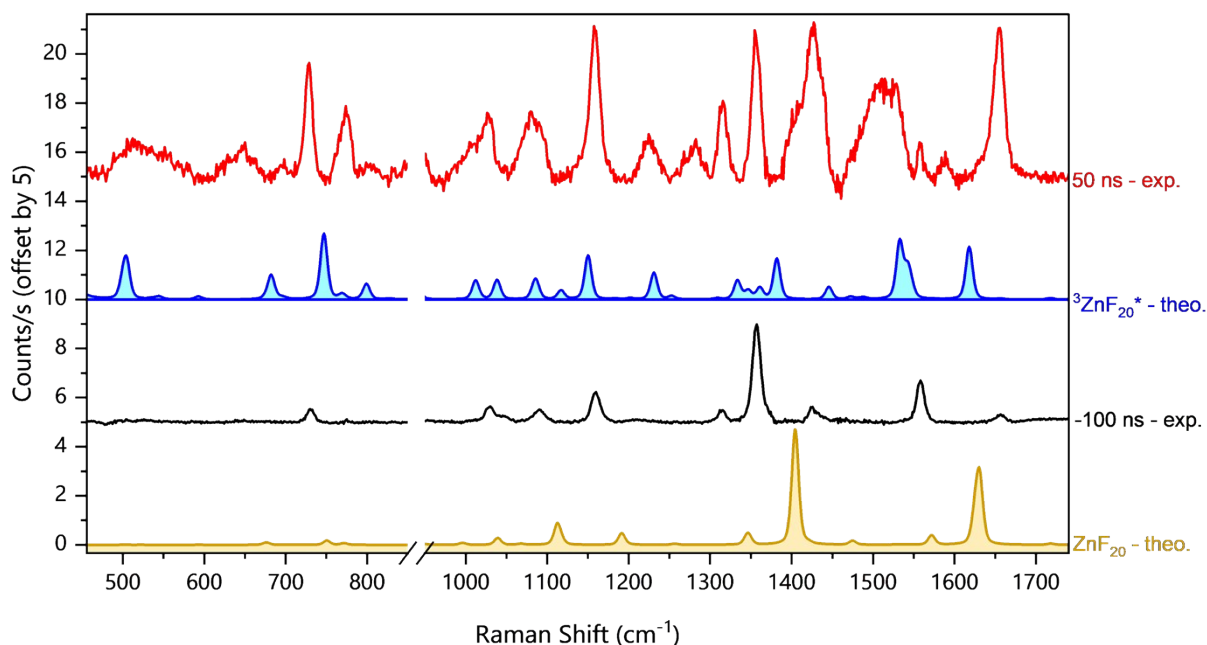

**Figure S18.** Comparison between theoretical and experimental resonance Raman spectra. Experimental spectra at -100 ns and 50 ns were obtained with 12.6  $\mu\text{M}$  ZnF<sub>20</sub> in CH<sub>3</sub>CN – raw dataset in Figure 4 of the main text. The theoretical spectra were simulated for ZnF<sub>20</sub> in the ground state, and for the T1 state of the porphyrin. It is worth mentioning that the experimentally recorded triplet state (at 50 ns) contains contributions of the ZnF<sub>20</sub> in the ground state.

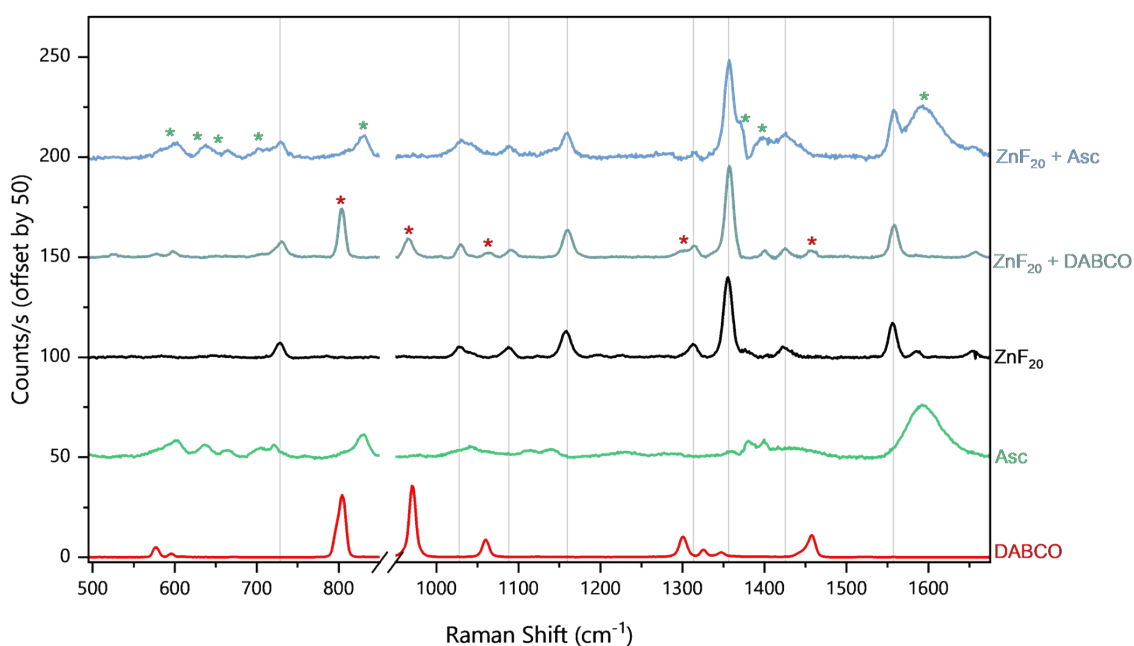

**Figure S19.** Comparison between the experimental spectra of  $12.6 \mu\text{M}$   $\text{ZnF}_{20}$  alone (black) and in the presence of  $100 \text{ mM}$  DABCO (pale green) and  $100 \text{ mM}$  Asc (pale blue). The reference spectra of  $100 \text{ mM}$  DABCO (red) and  $100 \text{ mM}$  ascorbate (green) alone are added for comparison. Red asterisks represent the vibrational modes of DABCO, and green asterisks represent the vibrational modes of ascorbate. Solid vertical black lines are markers of the vibrational modes of  $\text{ZnF}_{20}$ .  $\lambda_{\text{pump}} = 554 \text{ nm}$ ,  $2.2 \text{ mJ/pulse}$ ;  $\lambda_{\text{probe}} = 447 \text{ nm}$ ,  $2.2 \text{ mJ/pulse}$ .

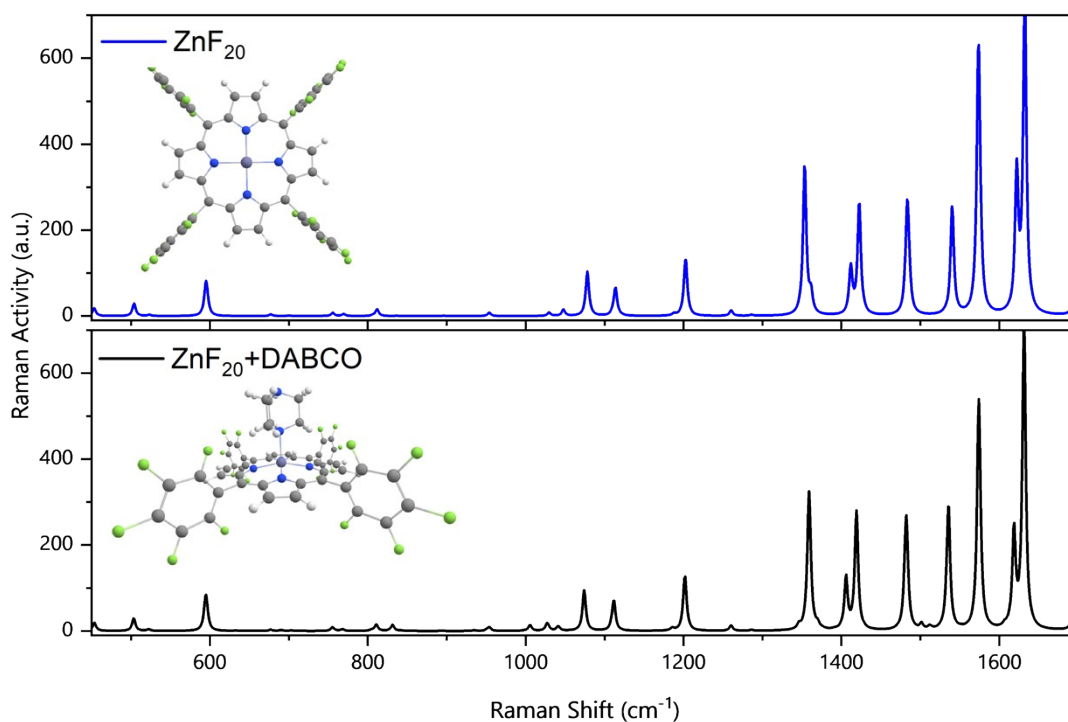

**Figure S20.** Non-resonant theoretical spectra for  $\text{ZnF}_{20}$  (top panel) and for the  $\text{ZnF}_{20}$ -DABCO 1:1 complex (bottom panel). The presence of DABCO coordinated to the porphyrin center does not affect the vibrational modes of the  $\text{ZnF}_{20}$ .

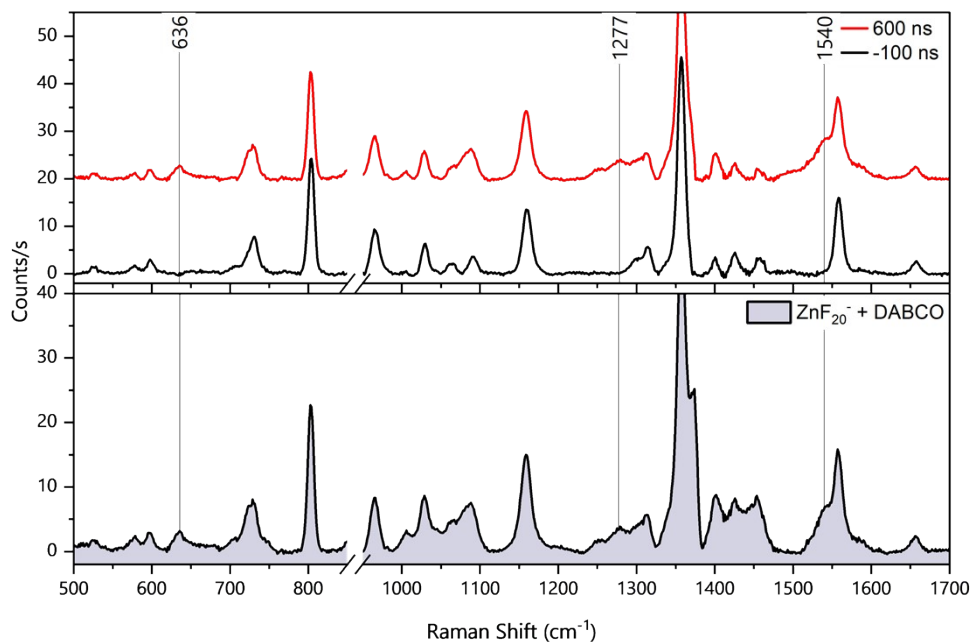

**Figure S21.** Comparison between the experimental TR3 spectra of 12.6  $\mu\text{M}$   $\text{ZnF}_{20}$  in the presence of 100 mM DABCO the reference reduced state obtained by chemical reduction. Top panel: TR3 spectra at -100 and 600 ns; bottom panel: spectrum of  $\text{ZnF}_{20}^-$  chemically produced by the addition of 1 eq.  $\text{CoCp}_2$  in the presence of 100 mM DABCO. Solid lines mark the bands observed for the reduced state.

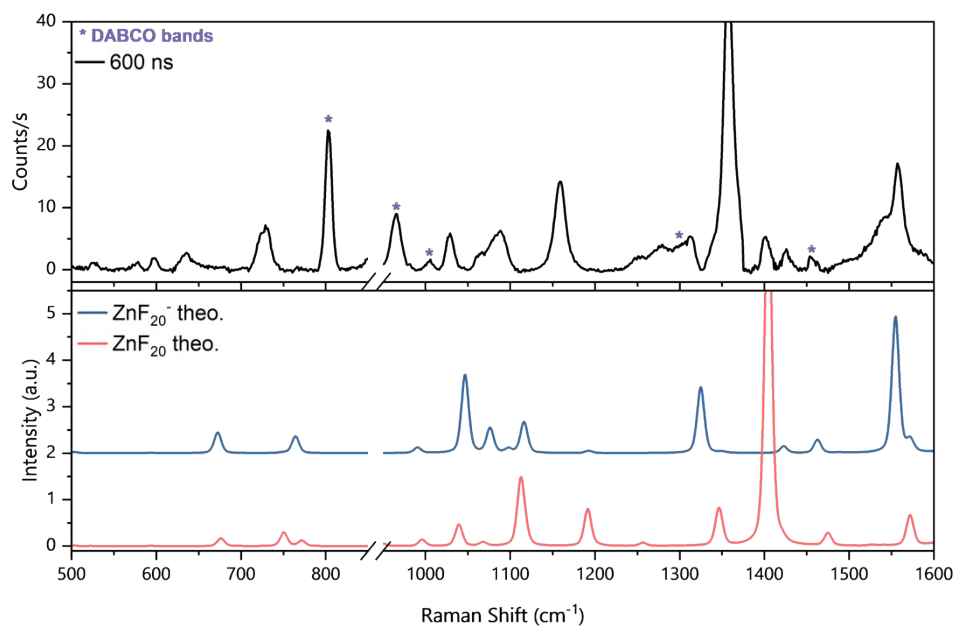

**Figure S22.** Top panel: TR3 spectrum of 12.6  $\mu\text{M}$   $\text{ZnF}_{20}$  in the presence of 100 mM DABCO at 600 ns delay, which corresponds to the maximal signature of  $\text{ZnF}_{20}^-$ -DABCO<sup>+</sup>; normal modes of DABCO are marked with an asterisk. Bottom panel: non-shifted theoretical spectra, in resonance conditions, obtained for  $\text{ZnF}_{20}$  in the ground state (red) and  $\text{ZnF}_{20}^-$  (blue).

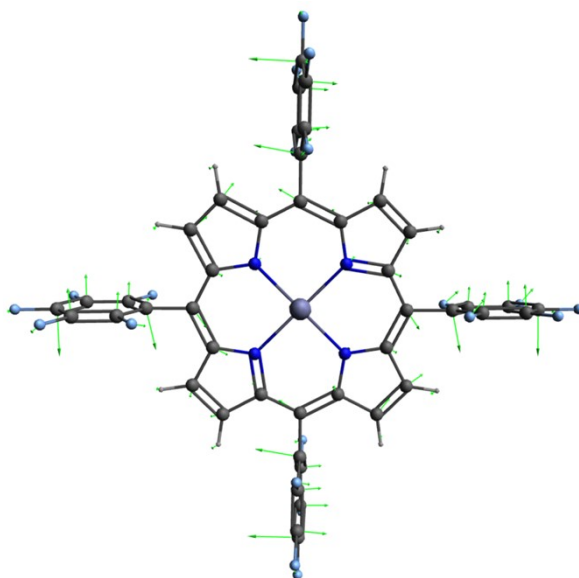

**Figure S23.** Vibrational mode detected for Zn<sup>I</sup>-DABCO<sup>+</sup> at 636 cm<sup>-1</sup> (experimental) tentatively assigned to an out-of-plane phenyl vibration [ $\pi_3'$ ,  $\nu(\text{CF})$ ] calculated at 672 cm<sup>-1</sup> (theoretical). Green arrows are representative of the non-normalized force constants.

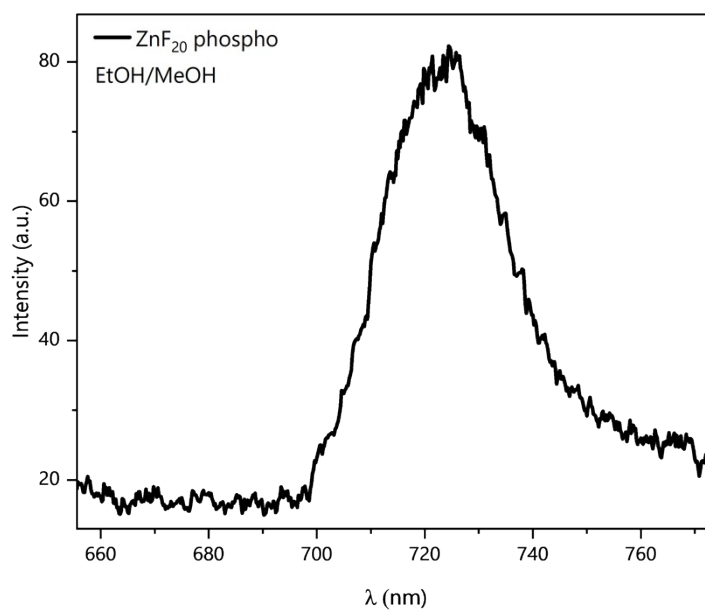

**Figure S24.** Phosphorescence spectrum of ZnF<sub>20</sub> recorded in an ethanol/methanol (EtOH/MeOH) mixture at 77 K.  $\lambda_{\text{exc}} = 555$  nm.
